# Supplementary material for: Integrated transcriptome, metabolome and phytohormone analysis reveals developmental differences between the first and secondary flowering in Castanea mollissima
Source: Front Plant Sci. 2023 Mar 16;14:1145418. doi: 10.3389/fpls.2023.1145418 (PMC10060901; doi:10.3389/fpls.2023.1145418)
Supplement: Supplementary file 4 [file Table_3.xlsx]

## Sheet: Sheet1
Supplementary table 3
Differential metabolite upregulation and downregulation of the top 10 metabolites in FMiF_vs_SMiF.
Index	Formula	Compounds	Class I	Class II	CAS	Level	FMiF-1	FMiF-2	FMiF-3	SMiF-1	SMiF-2	SMiF-3	VIP	Fold_Change	Log2FC	Type
Cmsn000894	C14H18O11	7-O-Galloyl-D-sedoheptulose	Tannins	Tannin	-	A	9	9	9	183690	159220	141020	1.15013	17923.3	14.1296	up
pmn001539	C48H36O30	3-O-Digalloyl-1,2,4,6-O-tetragalloyl-D-glucose	Tannins	Tannin	-	B	9	9	9	38412	52854	63290	1.14961	5724.3	12.4829	up
Zmcp002924	C27H31O16+	Cyanidin-3-O-(2''-O-glucosyl)glucoside	Flavonoids	Anthocyanins	38820-68-7	B	9	9	9	25640	25497	15664	1.14924	2474.11	11.2727	up
pme1793	C27H31O15+	Pelargonidin-3,5-O-diglucoside	Flavonoids	Anthocyanins	17334-58-6	B	9	9	9	25087	18896	21316	1.15003	2418.48	11.2399	up
Lmpp003705	C52H42O22	Procyanidin C1 3'-O-gallate	Tannins	Proanthocyanidins	-	B	9	9	9	16390	14528	18744	1.15006	1839.33	10.845	up
pme2060	C10H13N5	N6-Isopentenyladenine	Nucleotides and derivatives	Nucleotides and derivatives	2365-40-4	A	9	9	9	10460	12280	19177	1.14887	1552.48	10.6004	up
pma0692	C25H31N3O4	N1,N10-Bis(p-coumaroyl)spermidine	Alkaloids	Phenolamine	114916-05-1	B	9	9	9	15420	4645.8	9330.7	1.14449	1088.76	10.0885	up
Cmzp002057	C14H18O8	6-O-Acetylarbutin	Phenolic acids	Phenolic acids	10338-88-2	B	9	9	9	8011.1	8167.7	9712.2	1.15009	958.926	9.90528	up
pmp001119	C15H12O5	3,5-Dihydroxy-2,4-dimethoxy-9H-fluoren-9-one	Others	Others	-	B	9	9	9	6895.3	4662	7386.8	1.1492	701.633	9.45457	up
Lmfn004769	C27H22O15	Quercetin-3-O-(4''-O-galloyl)arabinoside	Flavonoids	Flavonols	-	A	9	9	9	5856.9	7540.1	5283.5	1.14965	691.87	9.43436	up
Lmln001195	C14H18O7	Picein (4-Acetylphenyl-glucoside)	Phenolic acids	Phenolic acids	530-14-3	B	5928.9	6610.1	7534.2	9	9	9	1.14994	0.00134508	-9.5381	down
mws0393	C20H24O2N2	Quinine	Alkaloids	Alkaloids	130-95-0	B	4935.3	10760	5831.2	9	9	9	1.14729	0.00125427	-9.63894	down
Hmbp006861	C23H24O9	1,2-O-Diferuloylglycerol	Phenolic acids	Phenolic acids	-	B	9016.3	7124.6	7144.2	9	9	9	1.15004	0.00115954	-9.75223	down
pmp000587	C24H22O14	Luteolin-7-O-(6''-malonyl)glucoside	Flavonoids	Flavonoid	-	A	7262.1	9514.5	11125	9	9	9	1.14939	0.000967686	-10.0132	down
pmb2636	C20H32O4	8,15-Dihydroxy-5,9,11,13-eicosatetraenoic acid	Lipids	Free fatty acids	77667-08-4	A	10913	10131	9693.5	9	9	9	1.15025	0.000878406	-10.1528	down
pmb3374	C14H18N4O3	N-p-Coumaroyl hydroxydehydroagmatine	Alkaloids	Phenolamine	-	B	18656	14374	11498	9	9	9	1.14959	0.00060636	-10.6875	down
pmb3072	C22H26O12	3-O-p-Coumaroylshikimic acid-O-glucoside	Phenolic acids	Phenolic acids	-	B	12770	17856	16265	9	9	9	1.14979	0.000575803	-10.7621	down
pmn001591	C30H48O5	Rutundic acid	Terpenoids	Triterpene	20137-37-5	A	19966	19269	19983	9	9	9	1.15026	0.000455942	-11.0989	down
mws1505	C17H16O4	Phenethyl caffeate	Phenolic acids	Phenolic acids	104594-70-9	B	35347	27872	29314	9	9	9	1.15014	0.000291788	-11.7428	down
Lmhn001650	C11H10O8	p-Hydroxybenzoyltartaric acid	Phenolic acids	Phenolic acids	-	B	46675	47099	45632	9	9	9	1.15027	0.000193679	-12.334	down
